# Supplementary material
Source: PubMed Central journal article supplement (PMC9377741)
Supplement: mct-21-0532_supplementary_figures_supp0.pdf [file mct-21-0532_supplementary_figures_supp0.pdf]

**A**

| TOP 5 Pathways MSTO-211H |                                                |      |           |           | TOP 5 Pathways PC-9 |          |                                                     |      |           |           |            |
|--------------------------|------------------------------------------------|------|-----------|-----------|---------------------|----------|-----------------------------------------------------|------|-----------|-----------|------------|
|                          |                                                | SIZE | NOM p-val | FDR q-val | FWER p-val          |          |                                                     | SIZE | NOM p-val | FDR q-val | FWER p-val |
| KEGG                     | P53_SIGNALING_PATHWAY                          | 67   | 0.000     | 0.068     | 0.067               | KEGG     | APOPTOSIS                                           | 85   | 0.000     | 0.318     | 0.260      |
|                          | APOPTOSIS                                      | 85   | 0.000     | 0.066     | 0.123               |          | RIG_I_LIKE_RECEPTOR_SIGNALING_PATHWAY               | 71   | 0.000     | 0.183     | 0.296      |
|                          | BIOSYNTHESIS_OF_UNSATURATED_FATTY_ACIDS        | 22   | 0.005     | 0.127     | 0.311               |          | PROTEIN_EXPORT                                      | 23   | 0.019     | 0.321     | 0.605      |
|                          | AMYOTROPHIC_LATERAL_SCLEROSIS_ALS              | 51   | 0.000     | 0.303     | 0.717               |          | MATURITY_ONSET_DIABETES_OF_THE_YOUNG                | 25   | 0.025     | 0.430     | 0.806      |
|                          | ABC_TRANSPORTERS                               | 44   | 0.005     | 0.280     | 0.762               |          | P53_SIGNALING_PATHWAY                               | 67   | 0.004     | 0.395     | 0.849      |
| Reactome                 | INTRINSIC_PATHWAY_FOR_APOPTOSIS                | 29   | 0.000     | 0.015     | 0.014               | Reactome | CTL44_INHIBITORY_SIGNALING                          | 21   | 0.000     | 0.140     | 0.128      |
|                          | ACTIVATION_OF_BH3_ONLY_PROTEINS                | 16   | 0.002     | 0.033     | 0.065               |          | ADP_SIGNALLING_THROUGH_P2RY12                       | 21   | 0.003     | 0.165     | 0.283      |
|                          | DESTABILIZATION_OF_MRNA_BY_BRF1                | 16   | 0.003     | 0.189     | 0.429               |          | IG_BETA_GAMMA_SIGNALLING_THROUGH_PI3KGAMMA          | 24   | 0.005     | 0.208     | 0.463      |
|                          | SIGNALING_BY_NODAL                             | 17   | 0.011     | 0.506     | 0.870               |          | MAPK_TARGETS_NUCLEAR_EVENTS_MEDIATED_BY_MAP_KINASES | 30   | 0.001     | 0.196     | 0.541      |
|                          | DESTABILIZATION_OF_MRNA_BY_TRISTETRAPROLIN_TTP | 16   | 0.013     | 0.554     | 0.940               |          | INTRINSIC_PATHWAY_FOR_APOPTOSIS                     | 29   | 0.002     | 0.174     | 0.578      |

**B**

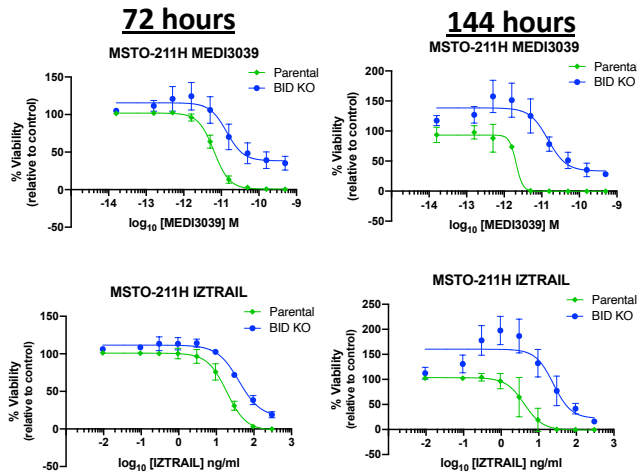

**C**

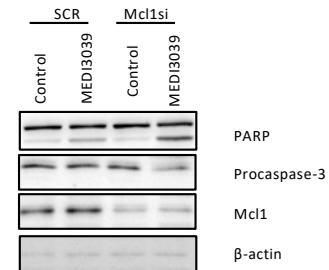

**D**

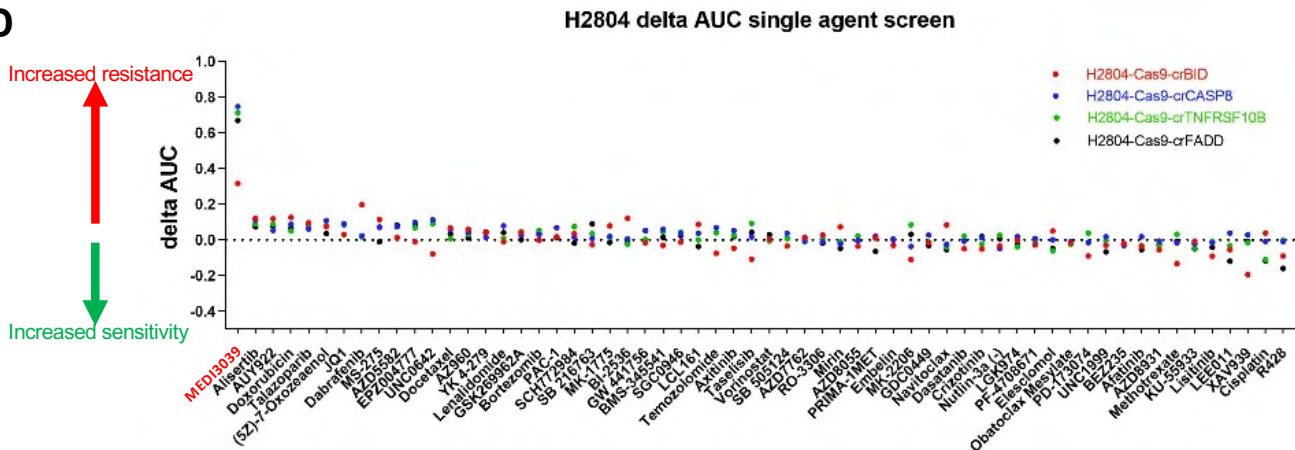

**E**

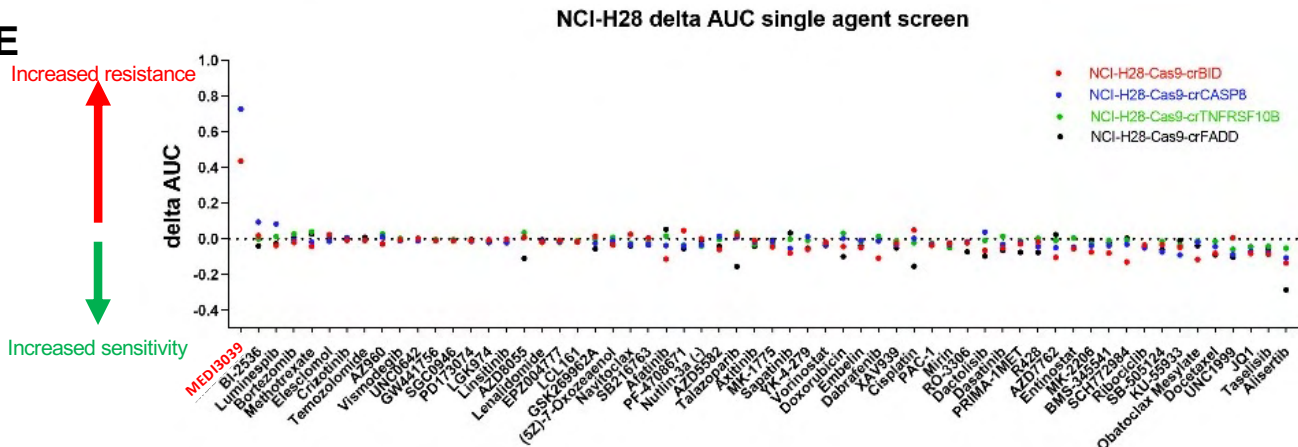

**Figure S1 | Silencing of apoptotic pathway genes confers resistance to agonists of the death receptor pathway.** (A) GSEA analysis of top enriched TRAIL resistance genes for MSTO-211 and PC-9 cell lines. (B) Dose response curves comparing effects of MEDI3039 and izTRAIL in MSTO-211H cell lines at 72 and 144 h. (C) Western blot analysis of effects of MCL1 depletion on parp cleavage in HCT116 cells treated with 1nM MEDI3039 (D/E) Each of the H2804 (C) and NCI-H28 (D) isogenic cell lines was screened versus the parental cell line with a concentration range of 60 compounds and viability measured at day 6. The AUC (area-under-the-curve) values for each isogenic cell line and the matched parental Cas9 line were subtracted to calculate a deltaAUC value, with high (positive) values indicating increased resistance to that compound in the isogenic lines, and low (negative) values increased sensitivity. X-axis - name of compounds screened. Y-Axis - delta AUC values.

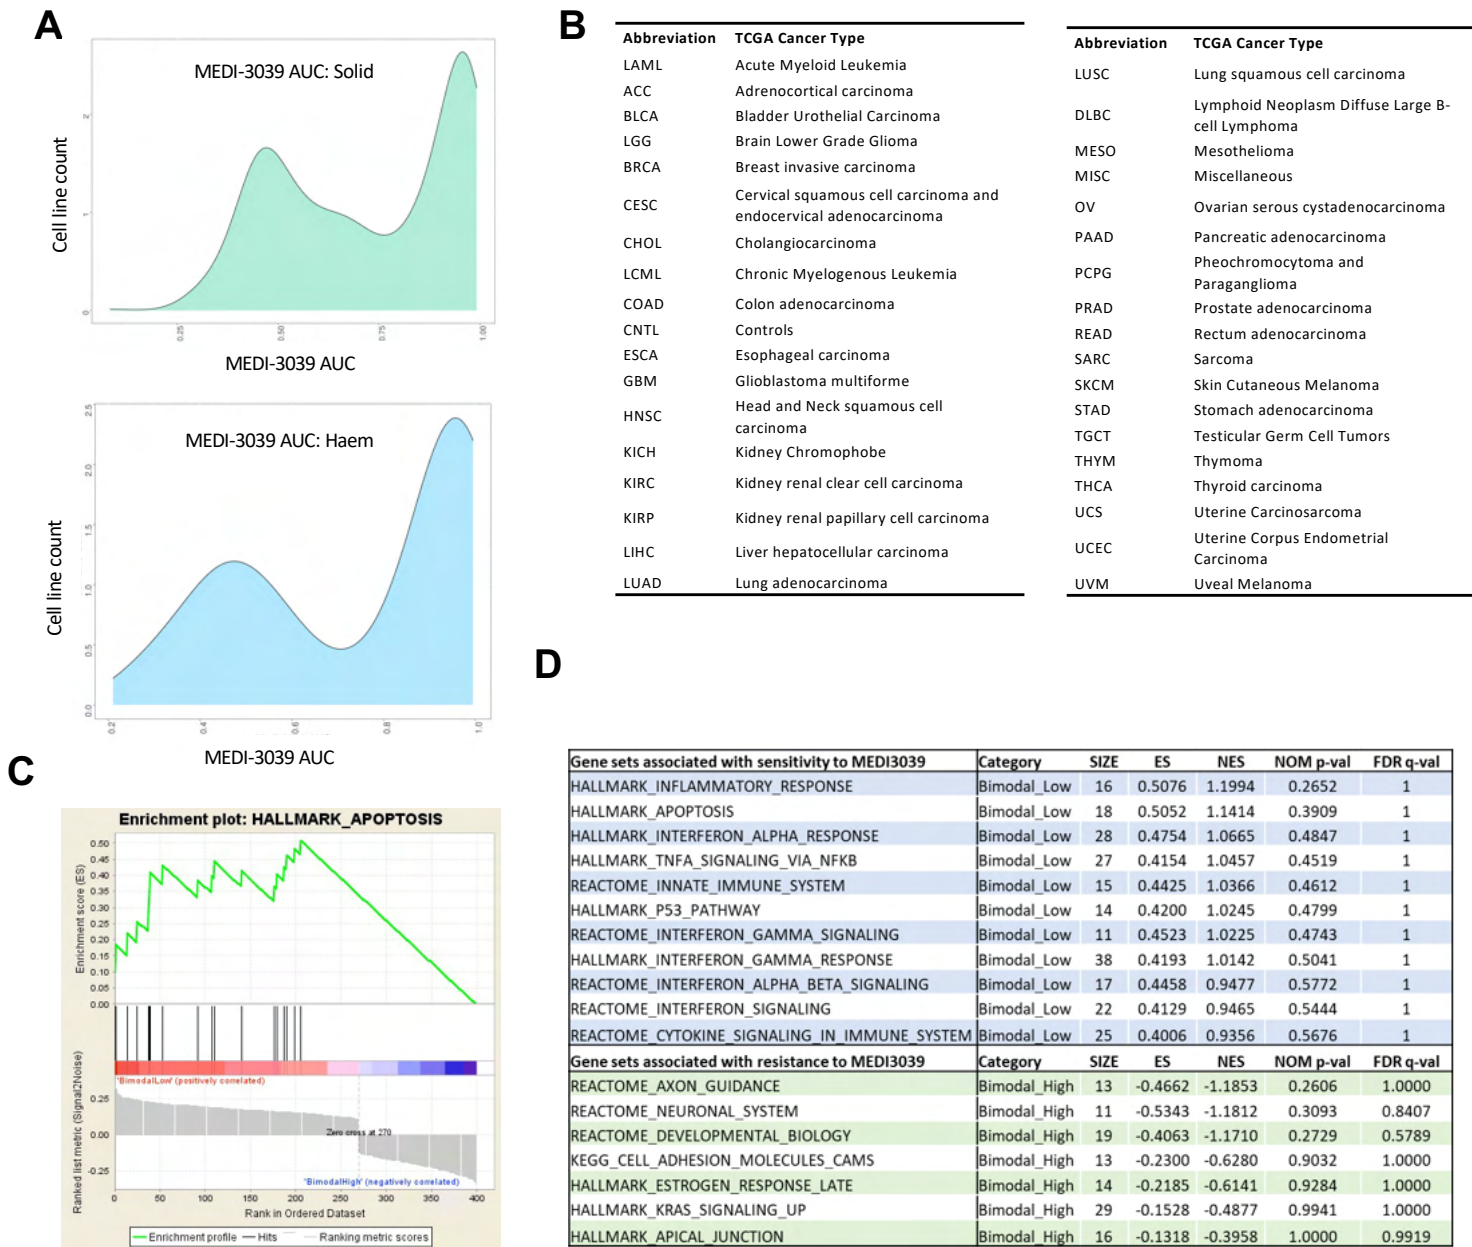

**Figure S2 | Sensitivity of cancer cell lines to MEDI3039. (A)** Bimodal distribution of IC50 values for MEDI3039 in solid (Green) versus haematological (Blue) cancers. **(B)** Table describing cancer types abbreviations used in figure **(C/D)** Gene set enrichment analysis for genes differentially expressed in sensitive versus resistant cell lines.

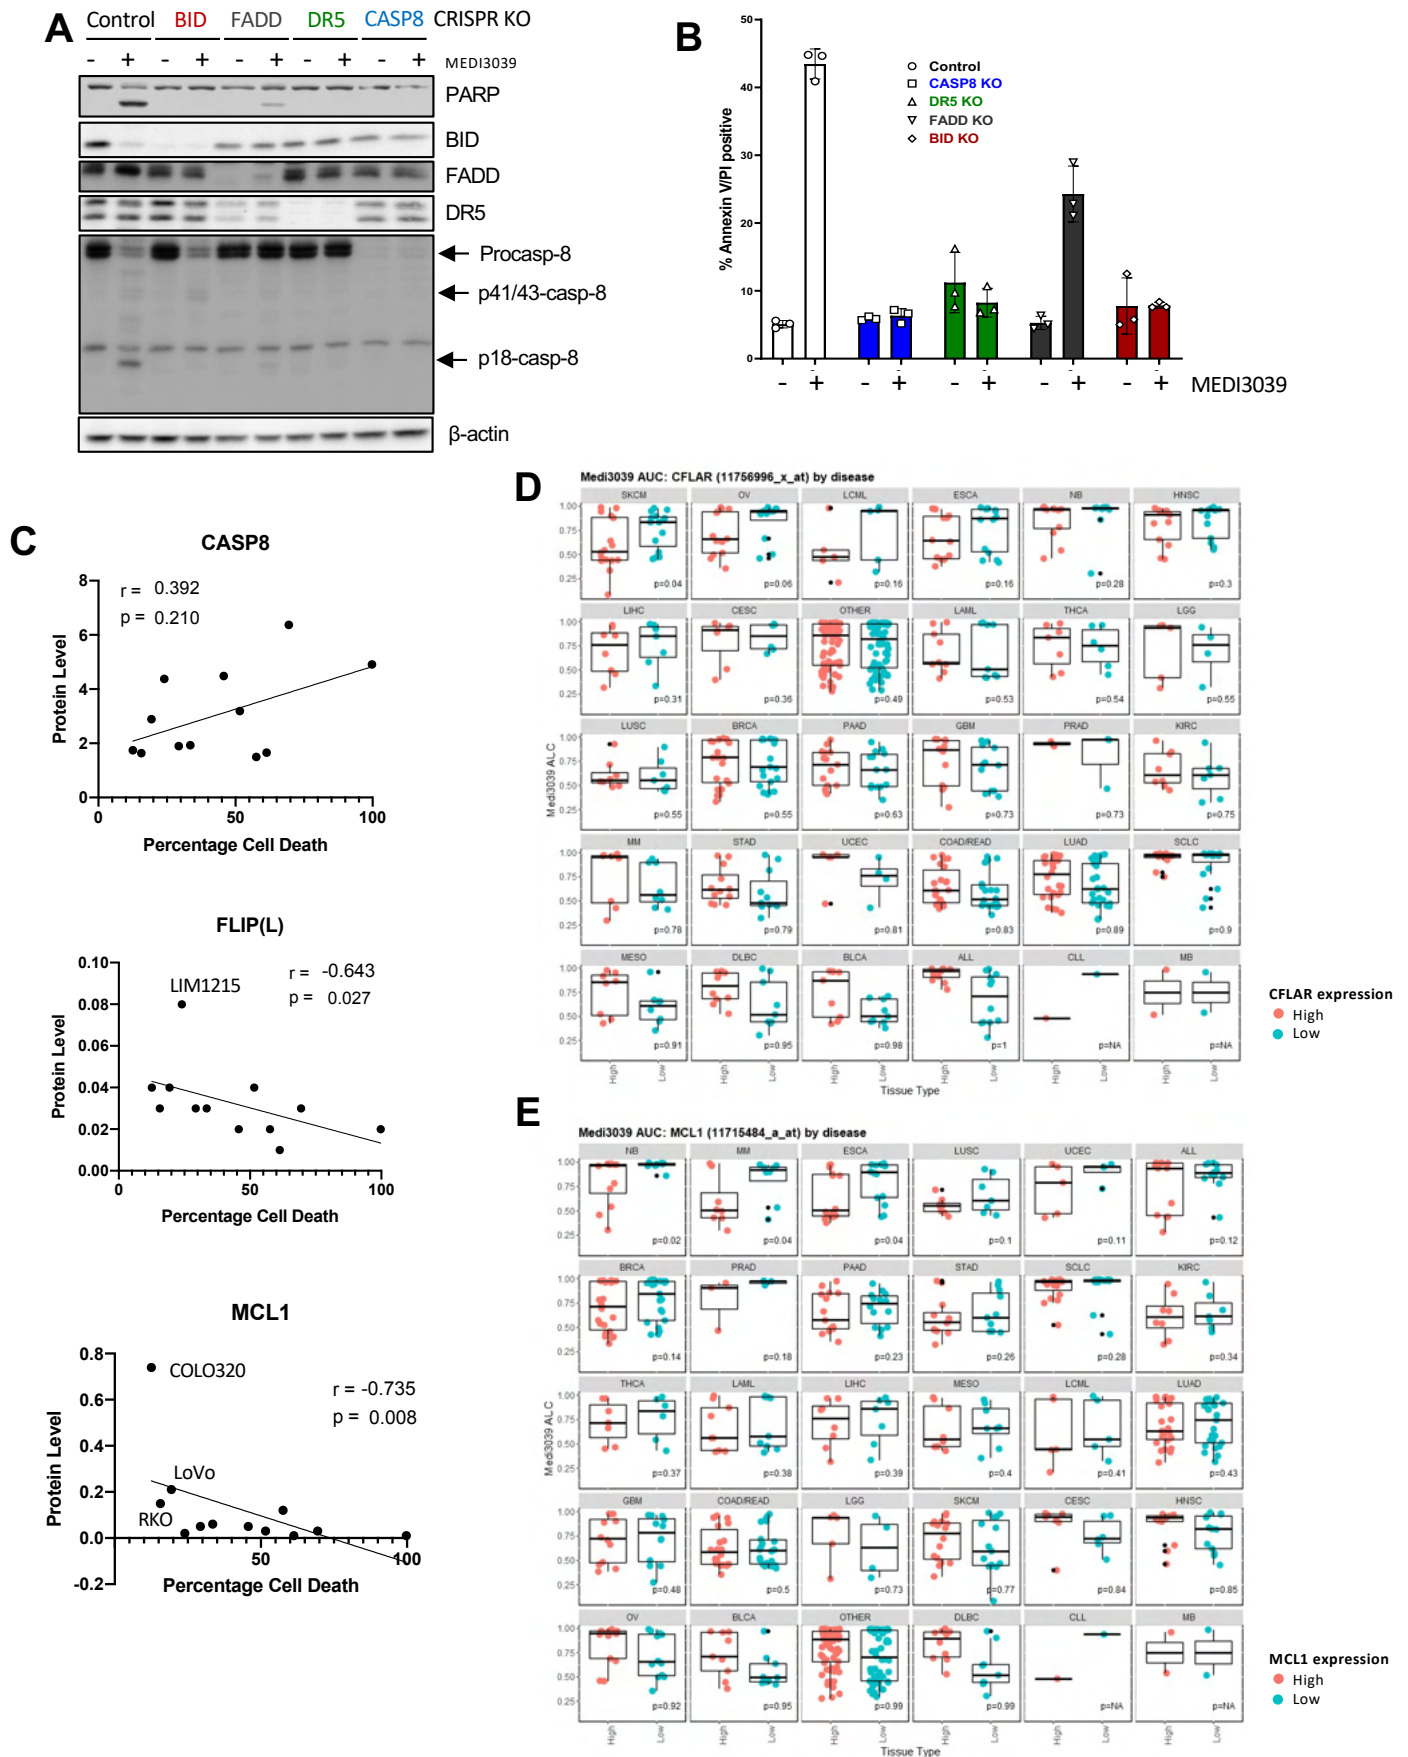

**Figure S3 | MEDI3039 sensitivity is significantly affected by FLIP(L).** Western blot (A) and high content microscopy (B) analyses of cell death induced by 100pM MEDI3039 treatment for 24h in control and CRISPR knockout HCT116 colorectal cancer cell lines. (C) CASP8/FLIP or CASP8/MCL1 ratio protein expression versus MEDI3039-induced cell death. (D) MEDI3039 AUC for cell lines for different cell types split according to discretised CASP8 or FLIP mRNA expression

# Supplementary Figure 4

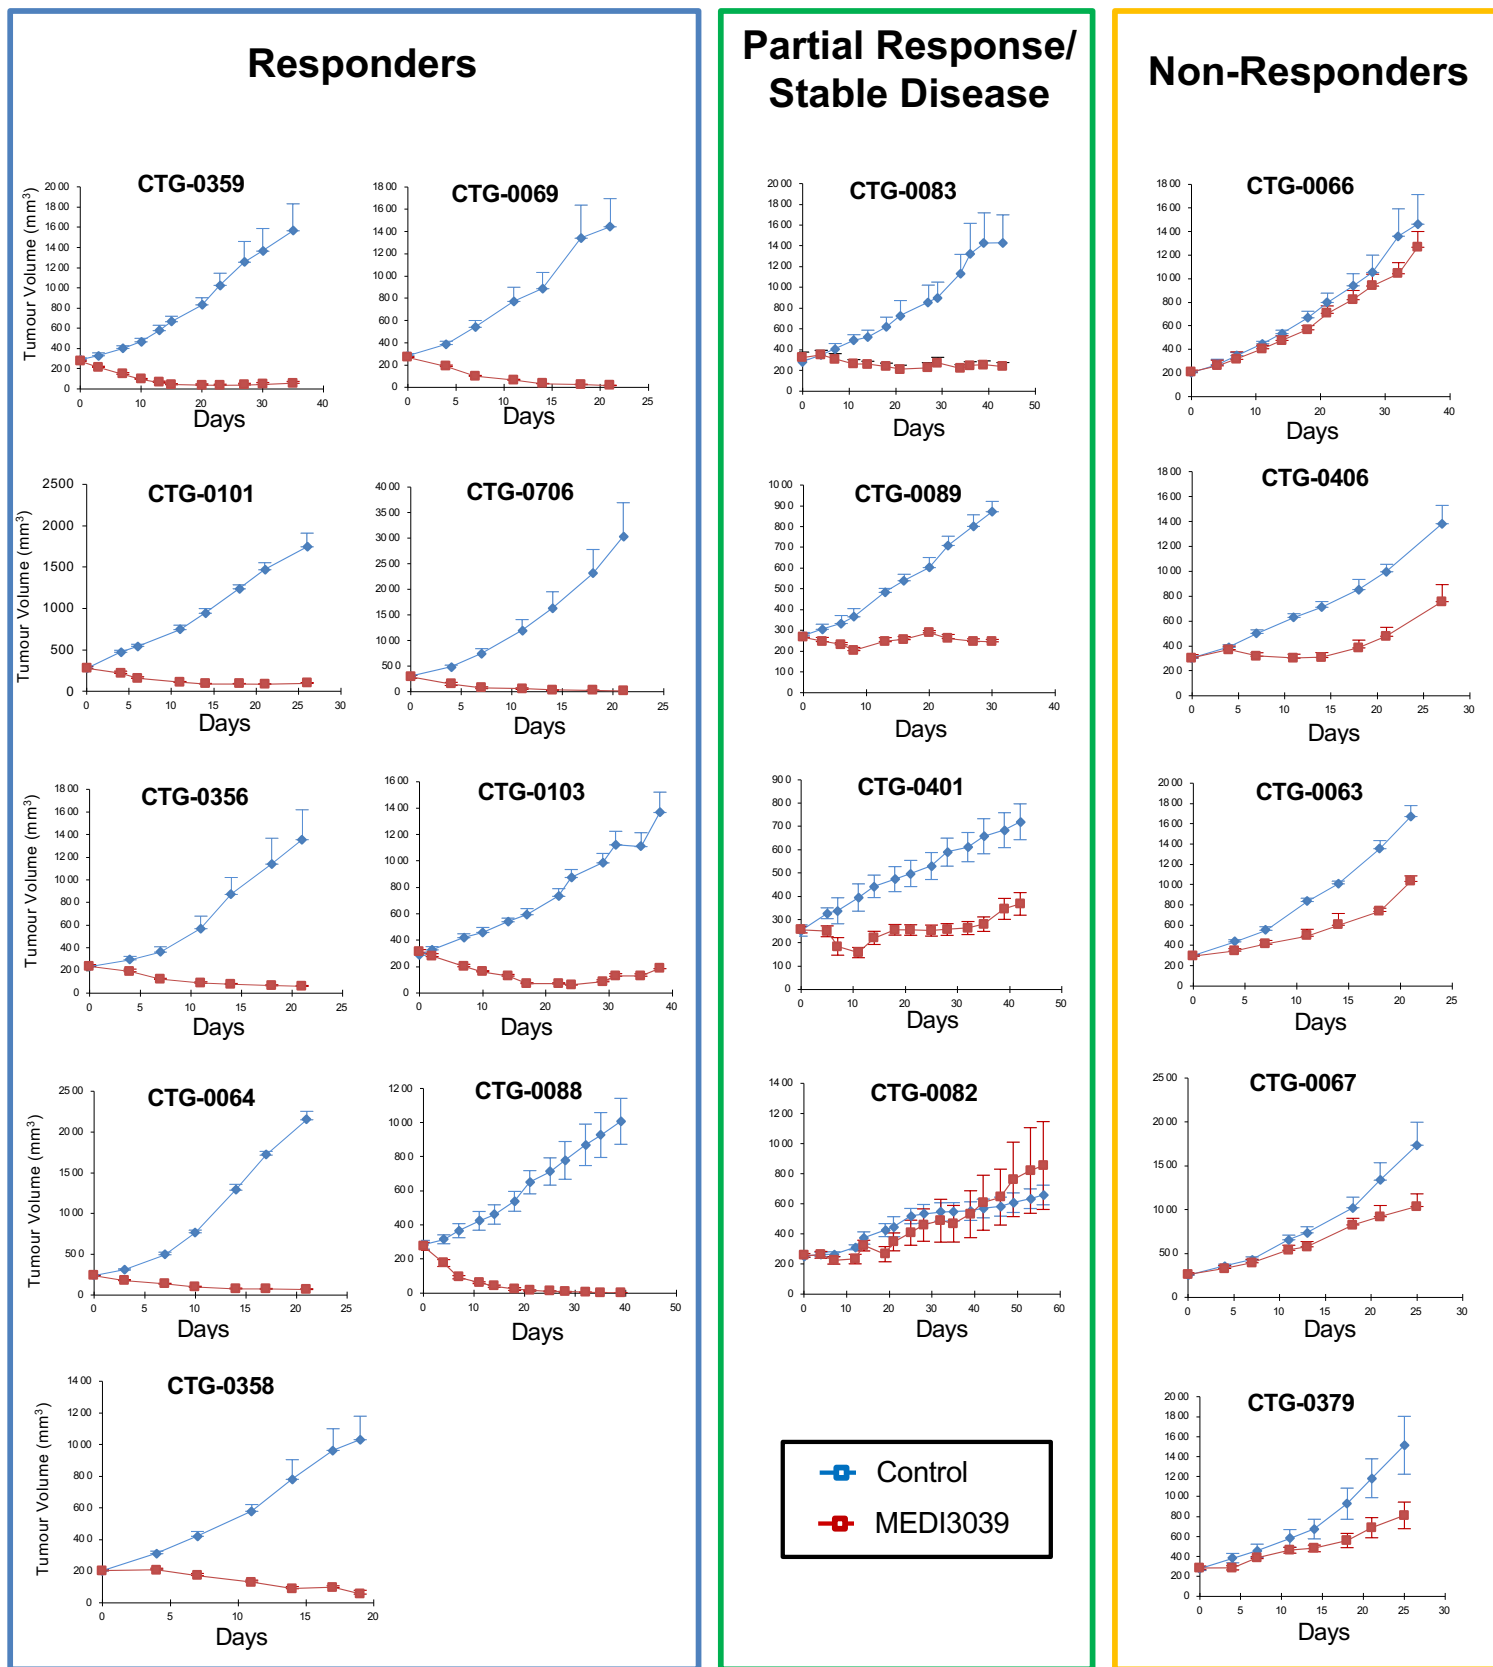

**Figure S4 | MEDI3039 treatment effect in a panel of CRC PDX models.** Tumour volume measurements measured in 18 CRC PDX models treated with 3mg/kg intraperitoneally with MEDI3039 twice per week for 2 weeks. X-axis – days. Y-axis – tumour volume ( $\text{mm}^3$ ). Error bars = SEM.



**A**IAPi  
↙**B**IAPi  
↙**C**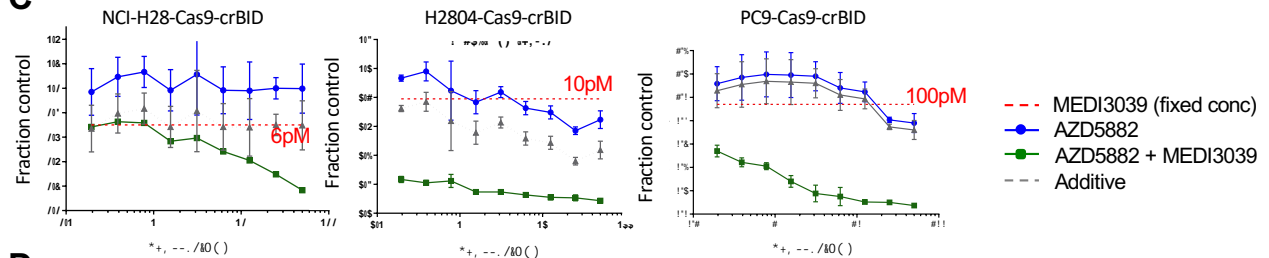**D**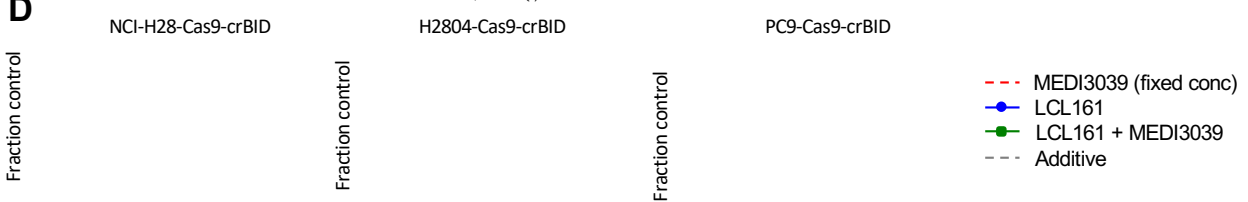**E**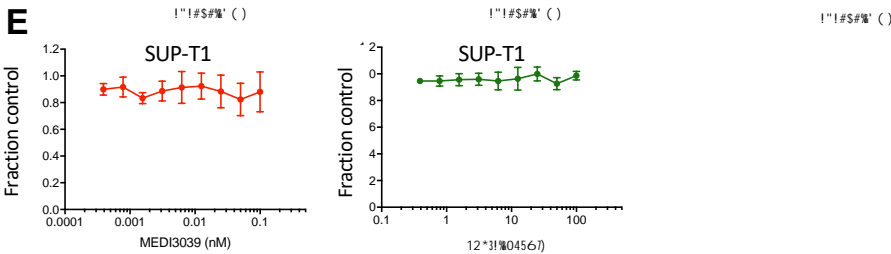

**Figure S5 | IAP inhibition re-sensitizes to MEDI3039 in BID-deleted lung cancer cells.** (A/B) Isogenic NCI-H28 or H2804 cell lines were screened against 59 compounds in combination with a fixed dose of MEDI3039 (100pM). Viability was measured at day 6. For each combination, a deltaAUC was calculated by subtracting the observed from the expected AUC (based upon the activity of the MEDI3039 concentration as a single agent). Values >0.2 are indicative of synergy. X-axis - name of compounds screened. Bid-KO NCI-H28, H2804 or PC-9 cells were treated with a concentration range of the IAP inhibitor AZD5882 (C) of LCL161 (D) for 6 days (blue line) or in combination with a fixed concentration of MEDI3039 (green, IC90 values of parental cell line). Indicated is the effect of the fixed conc. of MEDI3039 (red dotted) and the expected (additive) effect of the combination (grey dotted). X-axis - log<sub>10</sub> scale concentration range. Y-axis - relative viability effect. (E) Bid mutant SUP-T1 cells were treated with a concentration range of MEDI3039 or rTRAIL.

**A**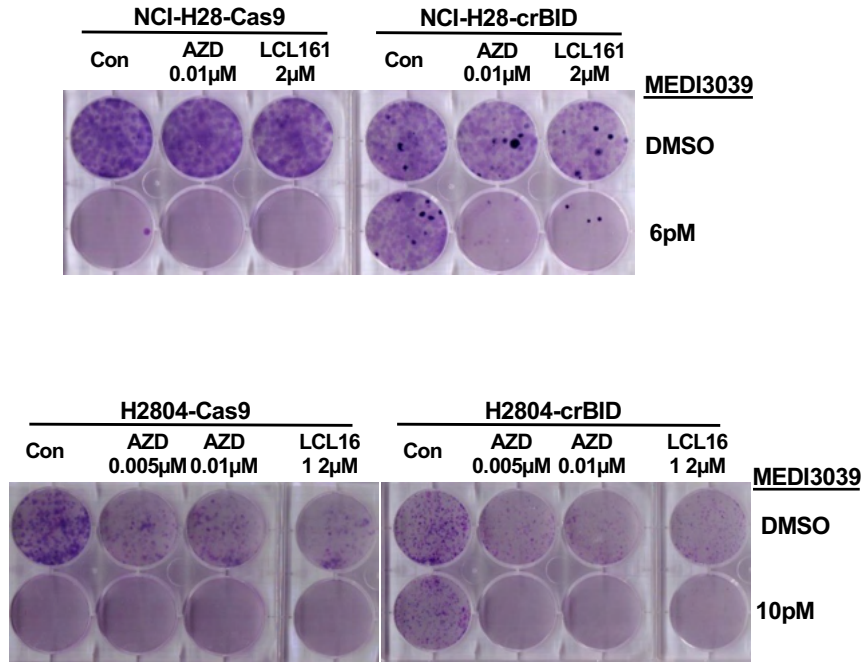**B**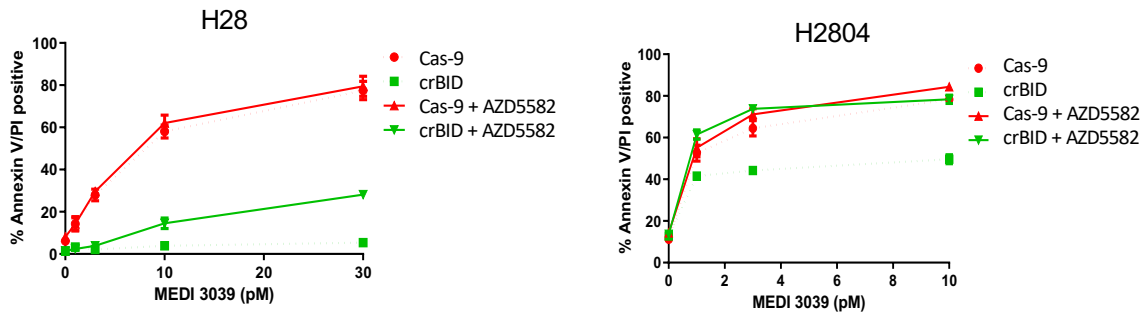

**Figure S6** | IAP inhibition re-sensitizes to MEDI3039 in BID-deleted lung cancer cells. (A) Clonogenic survival assays at day 14 in Cas9 vs crBID NCI-H28 AND H2804 cells treated with the indicated IAP inhibitors AZD and LCL161 as single agents or combined with MEDI3039 (IC90 concentration). Abbreviations - AZD, AZD5582. (B) AnnexinV/PI staining of Cas9 vs BID KO NCI-H28 AND H2804 cells following 24h treatment with MEDI3039 +/-10nM AZD5582
